# Supplementary material
Source: PubMed Central journal article supplement (PMC7964420)
Supplement: 2865_materials.pdf [file 2865_materials.pdf]

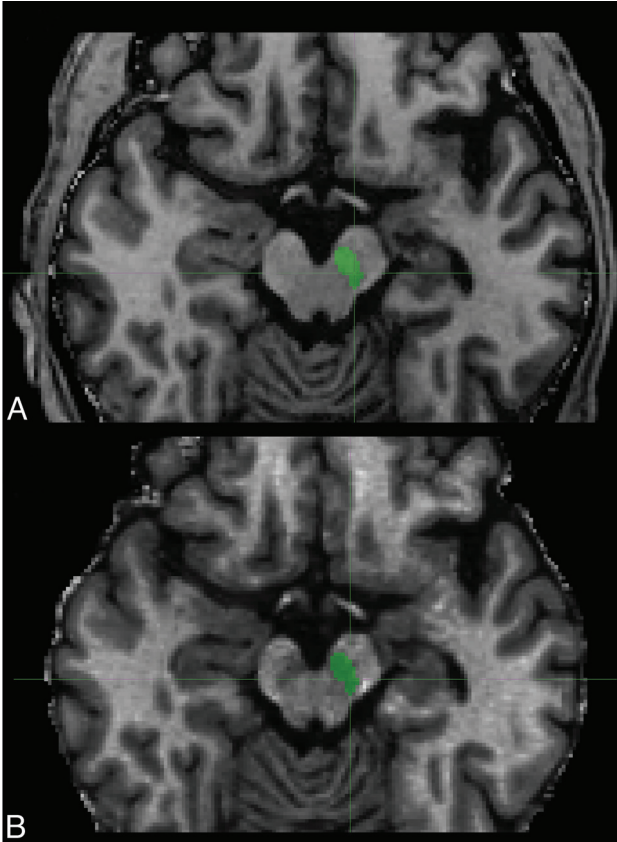

**On-line Fig 1:** Substantia nigra region of interest placement. Substantia nigra region of interest overlaid on the 3D-T1 (A) and magnetization transfer-map (B). Note the much better visibility of the SN on the magnetization transfer-map.

**On-line Table 1: Clinical and demographic details**

| #  | Age | Gender | Diagnosis      | Substantia Nigra<br>Ultrasound | Year of First<br>Diagnosis | Duration<br>(years) | L-DoPa<br>Responsiveness | T2*              | T2               | DTI              | MT/T1 |
|----|-----|--------|----------------|--------------------------------|----------------------------|---------------------|--------------------------|------------------|------------------|------------------|-------|
| 1  | 67  | Female | IPS            | N/A                            | 2005                       | 3                   | Present                  | Yes              | Yes              | N/A <sup>1</sup> | Yes   |
| 2  | 57  | Male   | IPS            | Clearly hyperechogenic         | 1998                       | 8                   | Present                  | Yes              | Yes              | Yes              | Yes   |
| 3  | 65  | Male   | IPS            | Clearly hyperechogenic         | 2003                       | 3                   | Present                  | Yes              | Yes              | Yes              | Yes   |
| 4  | 65  | Male   | IPS            | Clearly hyperechogenic         | 2000                       | 7                   | Present                  | Yes              | Yes              | Yes              | Yes   |
| 5  | 55  | Male   | IPS            | N/A                            | 2005                       | 3                   | Present                  | Yes              | Yes              | Yes              | Yes   |
| 6  | 67  | Male   | IPS            | N/A                            | 2007                       | 1                   | Present                  | Yes              | Yes              | Yes              | Yes   |
| 7  | 79  | Male   | IPS            | N/A                            | 1998                       | 10                  | Present                  | Yes              | Yes              | Yes              | Yes   |
| 8  | 74  | Male   | IPS            | N/A                            | 2001                       | 7                   | Present                  | Yes              | Yes              | Yes              | Yes   |
| 9  | 58  | Male   | IPS            | N/A                            | 2006                       | 2                   | Present                  | Yes              | Yes              | Yes              | Yes   |
| 10 | 69  | Male   | IPS            | N/A                            | 1999                       | 7                   | Present                  | Yes              | Yes              | Yes              | Yes   |
| 11 | 78  | Male   | IPS            | Clearly hyperechogenic         | 2004                       | 4                   | Present                  | N/A <sup>2</sup> | Yes              | Yes              | Yes   |
| 12 | 62  | Female | IPS            | N/A                            | 1993                       | 15                  | Present                  | Yes              | N/A <sup>2</sup> | Yes              | Yes   |
| 13 | 74  | Male   | Probable MSA-P | Not hyperechogenic             | 1998                       | 8                   | Discrete/transient       | N/A <sup>1</sup> | N/A <sup>1</sup> | Yes              | Yes   |
| 14 | 60  | Female | Probable MSA-P | Not hyperechogenic             | 2003                       | 3                   | Discrete/transient       | Yes              | Yes              | Yes              | Yes   |
| 15 | 66  | Female | Possible MSA-P | N/A                            | 2004                       | 2                   | None                     | Yes              | Yes              | Yes              | Yes   |
| 16 | 46  | Female | Possible MSA-P | Clearly hyperechogenic         | 2001                       | 6                   | Discrete/transient       | Yes              | Yes              | Yes              | Yes   |
| 17 | 58  | Male   | Possible MSA-P | Not hyperechogenic             | 2003                       | 4                   | Discrete/transient       | Yes              | Yes              | Yes              | Yes   |
| 18 | 67  | Male   | Probable MSA-P | Mildly hyperechogenic          | 2005                       | 2                   | Discrete/transient       | Yes              | Yes              | Yes              | Yes   |
| 19 | 68  | Female | Possible MSA-P | No window                      | 2003                       | 4                   | Present                  | Yes              | Yes              | Yes              | Yes   |
| 20 | 66  | Female | Probable MSA-P | No window                      | 1997                       | 10                  | Present                  | Yes              | Yes              | Yes              | Yes   |
| 21 | 68  | Male   | Possible MSA-P | Not hyperechogenic             | 2004                       | 3                   | Discrete/transient       | Yes              | Yes              | Yes              | Yes   |
| 22 | 52  | Male   | Possible MSA-P | No window                      | 2004                       | 3                   | Present                  | Yes              | Yes              | Yes              | Yes   |
| 23 | 64  | Male   | Possible PSP   | Not hyperechogenic             | 2006                       | 1                   | None                     | Yes              | Yes              | Yes              | Yes   |
| 24 | 69  | Male   | Possible PSP   | Not hyperechogenic             | 2003                       | 3                   | None                     | Yes              | Yes              | Yes              | Yes   |
| 25 | 72  | Male   | Probable PSP   | Mildly hyperechogenic          | 2004                       | 3                   | None                     | Yes              | Yes              | Yes              | Yes   |
| 26 | 70  | Male   | Possible PSP   | N/A                            | 2004                       | 3                   | Discrete/transient       | Yes              | Yes              | Yes              | Yes   |
| 27 | 64  | Male   | Probable PSP   | Not hyperechogenic             | 2005                       | 2                   | None                     | Yes              | Yes              | Yes              | Yes   |
| 28 | 65  | Male   | Probable PSP   | Not hyperechogenic             | 2007                       | 0                   | None                     | Yes              | Yes              | N/A <sup>3</sup> | Yes   |
| 29 | 66  | Female | Probable PSP   | N/A                            | 1999                       | 8                   | Discrete/transient       | Yes              | Yes              | Yes              | Yes   |
| 30 | 73  | Female | Probable PSP   | Not hyperechogenic             | 2006                       | 1                   | None                     | Yes              | Yes              | Yes              | Yes   |
| 31 | 60  | Male   | Probable PSP   | Not hyperechogenic             | 2006                       | 1                   | Discrete/transient       | Yes              | Yes              | Yes              | Yes   |
| 32 | 64  | Female | Control        |                                |                            |                     |                          | Yes              | Yes              | Yes              | Yes   |
| 33 | 63  | Female | Control        |                                |                            |                     |                          | Yes              | Yes              | Yes              | Yes   |
| 34 | 81  | Female | Control        |                                |                            |                     |                          | Yes              | Yes              | Yes              | Yes   |
| 35 | 80  | Male   | Control        |                                |                            |                     |                          | Yes              | Yes              | Yes              | Yes   |
| 36 | 68  | Male   | Control        |                                |                            |                     |                          | Yes              | Yes              | Yes              | Yes   |
| 37 | 68  | Male   | Control        |                                |                            |                     |                          | Yes              | Yes              | Yes              | Yes   |
| 38 | 67  | Male   | Control        |                                |                            |                     |                          | Yes              | Yes              | Yes              | Yes   |
| 39 | 54  | Female | Control        |                                |                            |                     |                          | Yes              | Yes              | Yes              | Yes   |
| 40 | 70  | Female | Control        |                                |                            |                     |                          | Yes              | N/A <sup>2</sup> | Yes              | Yes   |
| 41 | 76  | Female | Control        |                                |                            |                     |                          | Yes              | Yes              | Yes              | Yes   |
| 42 | 77  | Male   | Control        |                                |                            |                     |                          | N/A <sup>2</sup> | Yes              | Yes              | Yes   |
| 43 | 43  | Female | Control        |                                |                            |                     |                          | N/A <sup>2</sup> | Yes              | Yes              | Yes   |
| 44 | 68  | Female | Control        |                                |                            |                     |                          | Yes              | Yes              | Yes              | Yes   |

Demographic and clinical details of enrolled patients/controls and available quantitative paradigms are listed. IPS indicates idiopathic Parkinson syndrome, MSA-P = multiple systems atrophy Parkinson variant, PSP = progressive supranuclear palsy, N/A = not available.

Reasons for N/A scans: <sup>1</sup>movement, <sup>2</sup>data not in long-term storage (omitted by radiographer or lost in transfer), <sup>3</sup>failure of image reconstruction on the scanner console.

**On-line Table 2: Mean and SD of each region of interest, quantitative map and group**

|       |          | Putamen      |              | Pallidum     |              | Caudate      |              | Substantia Nigra |              |
|-------|----------|--------------|--------------|--------------|--------------|--------------|--------------|------------------|--------------|
|       |          | Left         | Right        | Left         | Right        | Left         | Right        | Left             | Right        |
| R2    | Controls | 12.71 ± 1.31 | 12.70 ± 1.45 | 13.89 ± 1.07 | 13.52 ± 1.19 | 10.99 ± 0.72 | 10.90 ± 0.95 | 12.39 ± 1.22     | 12.11 ± 1.30 |
| (1/s) | IPS      | 12.34 ± 0.43 | 12.49 ± 0.43 | 13.24 ± 1.09 | 13.07 ± 0.84 | 11.31 ± 0.52 | 11.14 ± 0.88 | 12.11 ± 0.57     | 12.08 ± 0.30 |
|       | MSA-P    | 12.76 ± 0.52 | 12.43 ± 1.24 | 14.30 ± 0.87 | 14.35 ± 1.01 | 11.64 ± 0.91 | 11.63 ± 0.95 | 12.13 ± 0.95     | 12.13 ± 1.06 |
|       | PSP      | 12.62 ± 0.80 | 12.61 ± 0.87 | 12.78 ± 1.14 | 12.96 ± 1.17 | 11.28 ± 0.83 | 11.59 ± 1.11 | 11.90 ± 0.92     | 12.29 ± 0.52 |
| R2*   | Controls | 28.26 ± 3.95 | 29.19 ± 4.18 | 35.75 ± 5.71 | 36.82 ± 3.75 | 24.03 ± 3.26 | 23.31 ± 2.95 | 30.85 ± 4.90     | 31.21 ± 5.15 |
| (1/s) | IPS      | 28.39 ± 2.67 | 27.69 ± 3.40 | 35.92 ± 5.80 | 33.38 ± 4.23 | 23.11 ± 2.58 | 23.22 ± 1.98 | 33.03 ± 4.30     | 32.42 ± 5.84 |
|       | MSA-P    | 34.74 ± 4.18 | 35.49 ± 3.46 | 41.43 ± 6.82 | 43.12 ± 4.07 | 25.65 ± 4.08 | 25.90 ± 4.37 | 33.82 ± 5.26     | 35.84 ± 5.38 |
|       | PSP      | 30.39 ± 4.16 | 31.16 ± 4.35 | 35.90 ± 4.95 | 35.45 ± 7.02 | 23.98 ± 3.25 | 24.29 ± 4.13 | 33.15 ± 6.05     | 33.11 ± 4.75 |
| MT    | Controls | 1.24 ± 0.08  | 1.20 ± 0.10  | 1.53 ± 0.20  | 1.54 ± 0.14  | 1.11 ± 0.08  | 1.10 ± 0.10  | 1.41 ± 0.14      | 1.38 ± 0.14  |
| (%)   | IPS      | 1.29 ± 0.11  | 1.24 ± 0.08  | 1.58 ± 0.16  | 1.54 ± 0.11  | 1.20 ± 0.07  | 1.16 ± 0.08  | 1.45 ± 0.18      | 1.40 ± 0.20  |
|       | MSA-P    | 1.21 ± 0.08  | 1.13 ± 0.12  | 1.54 ± 0.11  | 1.50 ± 0.11  | 1.15 ± 0.06  | 1.15 ± 0.08  | 1.32 ± 0.09      | 1.31 ± 0.08  |
|       | PSP      | 1.30 ± 0.11  | 1.25 ± 0.11  | 1.47 ± 0.16  | 1.41 ± 0.17  | 1.20 ± 0.08  | 1.20 ± 0.13  | 1.38 ± 0.14      | 1.29 ± 0.15  |
| MTR   | Controls | 43.67 ± 1.28 | 43.73 ± 1.74 | 46.24 ± 1.95 | 46.69 ± 1.74 | 42.93 ± 1.28 | 42.64 ± 0.98 | 46.11 ± 1.91     | 46.17 ± 1.54 |
| (%)   | IPS      | 44.57 ± 0.83 | 44.64 ± 1.14 | 47.13 ± 1.41 | 47.11 ± 1.48 | 44.12 ± 0.86 | 43.55 ± 1.04 | 46.95 ± 2.23     | 46.41 ± 3.08 |
|       | MSA-P    | 42.78 ± 1.89 | 42.05 ± 2.18 | 46.16 ± 1.24 | 45.53 ± 1.86 | 43.43 ± 0.91 | 43.23 ± 1.17 | 44.38 ± 1.17     | 44.83 ± 1.51 |
|       | PSP      | 44.07 ± 1.20 | 43.86 ± 1.43 | 45.11 ± 2.18 | 44.38 ± 2.87 | 43.09 ± 1.15 | 43.05 ± 1.43 | 45.68 ± 1.40     | 44.49 ± 2.42 |
| R1    | Controls | 0.71 ± 0.04  | 0.69 ± 0.05  | 0.87 ± 0.10  | 0.86 ± 0.06  | 0.63 ± 0.03  | 0.63 ± 0.04  | 0.83 ± 0.04      | 0.81 ± 0.04  |
| (1/s) | IPS      | 0.71 ± 0.03  | 0.71 ± 0.03  | 0.88 ± 0.06  | 0.87 ± 0.02  | 0.66 ± 0.03  | 0.66 ± 0.07  | 0.83 ± 0.07      | 0.82 ± 0.05  |
|       | MSA-P    | 0.74 ± 0.03  | 0.71 ± 0.04  | 0.89 ± 0.06  | 0.90 ± 0.05  | 0.65 ± 0.03  | 0.67 ± 0.03  | 0.86 ± 0.03      | 0.84 ± 0.02  |
|       | PSP      | 0.73 ± 0.03  | 0.72 ± 0.04  | 0.86 ± 0.04  | 0.86 ± 0.05  | 0.68 ± 0.05  | 0.69 ± 0.05  | 0.82 ± 0.04      | 0.82 ± 0.08  |
| FA    | Controls | 0.23 ± 0.02  | 0.22 ± 0.02  | 0.24 ± 0.04  | 0.25 ± 0.03  | 0.15 ± 0.01  | 0.15 ± 0.02  | 0.30 ± 0.02      | 0.32 ± 0.02  |
|       | IPS      | 0.23 ± 0.01  | 0.23 ± 0.01  | 0.24 ± 0.02  | 0.25 ± 0.02  | 0.16 ± 0.01  | 0.17 ± 0.03  | 0.30 ± 0.02      | 0.32 ± 0.03  |
|       | MSA-P    | 0.23 ± 0.01  | 0.23 ± 0.01  | 0.24 ± 0.02  | 0.26 ± 0.02  | 0.17 ± 0.03  | 0.17 ± 0.02  | 0.31 ± 0.04      | 0.31 ± 0.03  |
|       | PSP      | 0.24 ± 0.03  | 0.23 ± 0.02  | 0.24 ± 0.04  | 0.22 ± 0.03  | 0.16 ± 0.02  | 0.19 ± 0.02  | 0.30 ± 0.05      | 0.34 ± 0.04  |
| MD    | Controls | 0.77 ± 0.09  | 0.78 ± 0.10  | 0.82 ± 0.09  | 0.80 ± 0.09  | 1.16 ± 0.10  | 1.14 ± 0.11  | 0.80 ± 0.03      | 0.77 ± 0.03  |
|       | IPS      | 0.77 ± 0.05  | 0.77 ± 0.05  | 0.84 ± 0.09  | 0.80 ± 0.08  | 1.18 ± 0.10  | 1.11 ± 0.13  | 0.84 ± 0.05      | 0.80 ± 0.05  |
|       | MSA-P    | 0.80 ± 0.04  | 0.82 ± 0.08  | 0.84 ± 0.04  | 0.83 ± 0.06  | 1.11 ± 0.10  | 1.11 ± 0.07  | 0.81 ± 0.05      | 0.80 ± 0.05  |
|       | PSP      | 0.80 ± 0.06  | 0.81 ± 0.05  | 0.94 ± 0.09  | 0.93 ± 0.07  | 1.13 ± 0.14  | 1.13 ± 0.11  | 0.90 ± 0.09      | 0.87 ± 0.08  |

**Note:**—MT indicates magnetization transfer; MSA-P, multiple systems atrophy-type Parkinson.

**On-line Table 3: Post hoc ANOVA**

|     |             | Putamen |        | Pallidum |        | Caudate |       | Substantia Nigra |       |
|-----|-------------|---------|--------|----------|--------|---------|-------|------------------|-------|
|     |             | Left    | Right  | Left     | Right  | Left    | Right | Left             | Right |
| R2  | IPS - Cx    | n.s.    | n.s.   | n.s.     | n.s.   | n.s.    | n.s.  | n.s.             | n.s.  |
|     | MSA-P - Cx  | n.s.    | n.s.   | n.s.     | n.s.   | n.s.    | n.s.  | n.s.             | n.s.  |
|     | PSP - Cx    | n.s.    | n.s.   | n.s.     | n.s.   | n.s.    | n.s.  | n.s.             | n.s.  |
|     | MSA-P - IPS | n.s.    | n.s.   | n.s.     | n.s.   | n.s.    | n.s.  | n.s.             | n.s.  |
|     | PSP - IPS   | n.s.    | n.s.   | n.s.     | n.s.   | n.s.    | n.s.  | n.s.             | n.s.  |
| R2* | PSP - MSA-P | n.s.    | n.s.   | 0.024    | 0.050  | n.s.    | n.s.  | n.s.             | n.s.  |
|     | IPS - Cx    | n.s.    | n.s.   | n.s.     | n.s.   | n.s.    | n.s.  | n.s.             | n.s.  |
|     | MSA-P - Cx  | 0.003   | 0.005  | n.s.     | 0.039  | n.s.    | n.s.  | n.s.             | n.s.  |
|     | PSP - Cx    | n.s.    | n.s.   | n.s.     | n.s.   | n.s.    | n.s.  | n.s.             | n.s.  |
|     | MSA-P - IPS | 0.003   | <0.001 | n.s.     | <0.001 | n.s.    | n.s.  | n.s.             | n.s.  |
| MT  | PSP - IPS   | n.s.    | n.s.   | n.s.     | n.s.   | n.s.    | n.s.  | n.s.             | n.s.  |
|     | PSP - MSA-P | n.s.    | n.s.   | n.s.     | 0.011  | n.s.    | n.s.  | n.s.             | n.s.  |
|     | IPS - Cx    | n.s.    | n.s.   | n.s.     | n.s.   | 0.027   | n.s.  | n.s.             | n.s.  |
|     | MSA-P - Cx  | n.s.    | n.s.   | n.s.     | n.s.   | n.s.    | n.s.  | n.s.             | n.s.  |
|     | PSP - Cx    | n.s.    | n.s.   | n.s.     | n.s.   | 0.042   | n.s.  | n.s.             | n.s.  |
| MTR | MSA-P - IPS | n.s.    | n.s.   | n.s.     | n.s.   | n.s.    | n.s.  | n.s.             | n.s.  |
|     | PSP - IPS   | n.s.    | n.s.   | n.s.     | n.s.   | n.s.    | n.s.  | n.s.             | n.s.  |
|     | PSP - MSA-P | n.s.    | n.s.   | n.s.     | n.s.   | n.s.    | n.s.  | n.s.             | n.s.  |
|     | IPS - Cx    | n.s.    | n.s.   | n.s.     | n.s.   | n.s.    | n.s.  | n.s.             | n.s.  |
|     | MSA-P - Cx  | n.s.    | n.s.   | n.s.     | n.s.   | n.s.    | n.s.  | n.s.             | n.s.  |
| R1  | PSP - Cx    | n.s.    | n.s.   | n.s.     | n.s.   | n.s.    | n.s.  | n.s.             | n.s.  |
|     | MSA-P - IPS | 0.025   | 0.006  | n.s.     | n.s.   | n.s.    | n.s.  | 0.011            | n.s.  |
|     | PSP - IPS   | n.s.    | n.s.   | (0.081)  | 0.025  | n.s.    | n.s.  | n.s.             | n.s.  |
|     | PSP - MSA-P | n.s.    | n.s.   | n.s.     | n.s.   | n.s.    | n.s.  | n.s.             | n.s.  |
|     | IPS - Cx    | n.s.    | n.s.   | n.s.     | n.s.   | n.s.    | n.s.  | n.s.             | n.s.  |
| FA  | MSA-P - Cx  | n.s.    | n.s.   | n.s.     | n.s.   | n.s.    | n.s.  | n.s.             | n.s.  |
|     | PSP - Cx    | n.s.    | n.s.   | n.s.     | n.s.   | 0.016   | 0.026 | n.s.             | n.s.  |
|     | MSA-P - IPS | n.s.    | n.s.   | n.s.     | n.s.   | n.s.    | n.s.  | n.s.             | n.s.  |
|     | PSP - IPS   | n.s.    | n.s.   | n.s.     | n.s.   | n.s.    | n.s.  | n.s.             | n.s.  |
|     | PSP - MSA-P | n.s.    | n.s.   | n.s.     | n.s.   | n.s.    | n.s.  | n.s.             | n.s.  |
|     | IPS - Cx    | n.s.    | n.s.   | n.s.     | n.s.   | n.s.    | n.s.  | n.s.             | n.s.  |
|     | MSA-P - Cx  | n.s.    | n.s.   | n.s.     | n.s.   | n.s.    | n.s.  | n.s.             | n.s.  |
|     | PSP - Cx    | n.s.    | n.s.   | n.s.     | n.s.   | n.s.    | 0.004 | n.s.             | n.s.  |
|     | MSA-P - IPS | n.s.    | n.s.   | n.s.     | n.s.   | n.s.    | n.s.  | n.s.             | n.s.  |
| MD  | PSP - IPS   | n.s.    | n.s.   | n.s.     | n.s.   | n.s.    | n.s.  | n.s.             | n.s.  |
|     | PSP - MSA-P | n.s.    | n.s.   | n.s.     | n.s.   | n.s.    | n.s.  | n.s.             | n.s.  |
|     | IPS - Cx    | n.s.    | n.s.   | n.s.     | n.s.   | n.s.    | n.s.  | n.s.             | n.s.  |
|     | MSA-P - Cx  | n.s.    | n.s.   | n.s.     | n.s.   | n.s.    | n.s.  | n.s.             | n.s.  |
|     | PSP - Cx    | n.s.    | n.s.   | 0.021    | 0.007  | n.s.    | n.s.  | <0.001           | 0.001 |
|     | MSA-P - IPS | n.s.    | n.s.   | n.s.     | n.s.   | n.s.    | n.s.  | n.s.             | n.s.  |
|     | PSP - IPS   | n.s.    | n.s.   | n.s.     | 0.010  | n.s.    | n.s.  | (0.090)          | 0.023 |
|     | PSP - MSA-P | n.s.    | n.s.   | n.s.     | n.s.   | n.s.    | n.s.  | 0.005            | 0.044 |

**Note:**—MT indicates magnetization transfer; MSA-P, multiple systems atrophy-type Parkinson; C, control; n.s., no significant difference ( $P > .10$ ). Corrected  $P$ -values (Bonferroni) of 1-way post-hoc ANOVA for each quantitative map and region of interest are shown. Values in parentheses are trend level findings ( $P < 0.10$  but  $> 0.05$ ) that are shown when the contralateral structure showed a significant difference.

**On-line Table 4: ROC analysis results<sup>a</sup>**

|     |           | PU                          |                             | PA                        |                             | CN                        |                             | SN                          |                             |
|-----|-----------|-----------------------------|-----------------------------|---------------------------|-----------------------------|---------------------------|-----------------------------|-----------------------------|-----------------------------|
|     |           | Left                        | Right                       | Left                      | Right                       | Left                      | Right                       | Left                        | Right                       |
| R2  | IPS-Cx    | 0.67 <sup>b</sup>           | 0.62 <sup>b</sup>           | 0.69 <sup>b</sup>         | 0.64 <sup>b</sup>           | 0.64 <sup>c</sup>         | 0.58 <sup>c</sup>           | 0.54 <sup>b</sup>           | 0.52 <sup>b</sup>           |
|     | MSA-P-Cx  | 0.50 <sup>c</sup>           | 0.55 <sup>b</sup>           | 0.57 <sup>c</sup>         | 0.70 <sup>c</sup>           | 0.70 <sup>c</sup>         | 0.78 <sup>c</sup>           | 0.56 <sup>b</sup>           | 0.52 <sup>c</sup>           |
|     | PSP-Cx    | 0.57 <sup>b</sup>           | 0.58 <sup>b</sup>           | 0.74 <sup>b</sup>         | 0.66 <sup>b</sup>           | 0.65 <sup>c</sup>         | 0.74 <sup>c</sup>           | 0.57 <sup>b</sup>           | 0.53 <sup>c</sup>           |
|     | MSA-P-IPS | 0.77 <sup>c</sup> (0.044)   | 0.64 <sup>c</sup>           | 0.78 <sup>c</sup> (0.037) | 0.85 <sup>c</sup> (0.009)   | 0.60 <sup>c</sup>         | 0.66 <sup>c</sup>           | 0.52 <sup>c</sup>           | 0.51 <sup>c</sup>           |
|     | PSP-IPS   | 0.61 <sup>c</sup>           | 0.52 <sup>c</sup>           | 0.67 <sup>l</sup>         | 0.53 <sup>c</sup>           | 0.52 <sup>c</sup>         | 0.59 <sup>c</sup>           | 0.56 <sup>b</sup>           | 0.61 <sup>c</sup>           |
| R2* | PSP-MSA-P | 0.61 <sup>b</sup>           | 0.54 <sup>b</sup>           | 0.83 <sup>b</sup> (0.019) | 0.84 <sup>b</sup> (0.015)   | 0.58 <sup>b</sup>         | 0.52 <sup>b</sup>           | 0.53 <sup>b</sup>           | 0.54 <sup>c</sup>           |
|     | IPS-Cx    | 0.58 <sup>c</sup>           | 0.60 <sup>b</sup>           | 0.50 <sup>c</sup>         | 0.72 <sup>b</sup>           | 0.58 <sup>b</sup>         | 0.50 <sup>b</sup>           | 0.66 <sup>c</sup>           | 0.52 <sup>c</sup>           |
|     | MSA-P-Cx  | 0.88 <sup>c,d</sup> (0.004) | 0.87 <sup>c,d</sup> (0.006) | 0.75 <sup>c</sup>         | 0.88 <sup>c,d</sup> (0.004) | 0.62 <sup>c</sup>         | 0.73 <sup>c</sup>           | 0.69 <sup>c</sup>           | 0.72 <sup>c</sup>           |
|     | PSP-Cx    | 0.69 <sup>c</sup>           | 0.68 <sup>c</sup>           | 0.53 <sup>b</sup>         | 0.54 <sup>c</sup>           | 0.54 <sup>b</sup>         | 0.54 <sup>c</sup>           | 0.61 <sup>c</sup>           | 0.61 <sup>c</sup>           |
|     | MSA-P-IPS | 0.94 <sup>c,d</sup> (0.001) | 0.95 <sup>c,d</sup> (0.001) | 0.74 <sup>c</sup>         | 0.96 <sup>c,d</sup> (0.001) | 0.68 <sup>c</sup>         | 0.71 <sup>c</sup>           | 0.53 <sup>c</sup>           | 0.67 <sup>c</sup>           |
| MT  | PSP-IPS   | 0.65 <sup>c</sup>           | 0.74 <sup>c</sup>           | 0.53 <sup>c</sup>         | 0.70 <sup>c</sup>           | 0.58 <sup>c</sup>         | 0.57 <sup>c</sup>           | 0.55 <sup>l</sup>           | 0.57 <sup>c</sup>           |
|     | PSP-MSA-P | 0.79 <sup>b</sup> (0.038)   | 0.80 <sup>b</sup> (0.031)   | 0.75 <sup>b</sup>         | 0.89 <sup>b,d</sup> (0.005) | 0.62 <sup>b</sup>         | 0.63 <sup>b</sup>           | 0.54 <sup>b</sup>           | 0.63 <sup>b</sup>           |
|     | IPS-Cx    | 0.64 <sup>c</sup>           | 0.58 <sup>c</sup>           | 0.50 <sup>c</sup>         | 0.50 <sup>b</sup>           | 0.80 <sup>c</sup> (0.014) | 0.66 <sup>c</sup>           | 0.57 <sup>c</sup>           | 0.51 <sup>c</sup>           |
|     | MSA-P-Cx  | 0.59 <sup>b</sup>           | 0.68 <sup>b</sup>           | 0.60 <sup>b</sup>         | 0.63 <sup>b</sup>           | 0.62 <sup>c</sup>         | 0.65 <sup>c</sup>           | 0.70 <sup>b</sup>           | 0.69 <sup>b</sup>           |
|     | PSP-Cx    | 0.60 <sup>c</sup>           | 0.57 <sup>c</sup>           | 0.64 <sup>b</sup>         | 0.7 <sup>b</sup>            | 0.80 <sup>c</sup> (0.021) | 0.74 <sup>c</sup>           | 0.57 <sup>b</sup>           | 0.74 <sup>b</sup>           |
| MTR | MSA-P-IPS | 0.64 <sup>b</sup>           | 0.75 <sup>b</sup>           | 0.56 <sup>b</sup>         | 0.56 <sup>b</sup>           | 0.67 <sup>b</sup>         | 0.56 <sup>b</sup>           | 0.73 <sup>b</sup>           | 0.64 <sup>b</sup>           |
|     | PSP-IPS   | 0.51 <sup>b</sup>           | 0.57 <sup>c</sup>           | 0.69 <sup>b</sup>         | 0.74 <sup>b</sup>           | 0.53 <sup>b</sup>         | 0.58 <sup>c</sup>           | 0.66 <sup>b</sup>           | 0.72 <sup>b</sup>           |
|     | PSP-MSA-P | 0.70 <sup>c</sup>           | 0.73 <sup>c</sup>           | 0.67 <sup>b</sup>         | 0.68 <sup>b</sup>           | 0.72 <sup>c</sup>         | 0.66 <sup>c</sup>           | 0.64 <sup>c</sup>           | 0.61 <sup>b</sup>           |
|     | IPS-Cx    | 0.76 <sup>b</sup> (0.034)   | 0.65 <sup>c</sup>           | 0.64 <sup>c</sup>         | 0.54 <sup>c</sup>           | 0.81 <sup>c</sup> (0.010) | 0.77 <sup>c</sup> (0.026)   | 0.59 <sup>c</sup>           | 0.52 <sup>c</sup>           |
|     | MSA-P-Cx  | 0.62 <sup>b</sup>           | 0.73 <sup>b</sup>           | 0.56 <sup>b</sup>         | 0.67 <sup>b</sup>           | 0.60 <sup>c</sup>         | 0.67 <sup>c</sup>           | 0.77 <sup>b</sup> (0.030)   | 0.71 <sup>b</sup>           |
| R1  | PSP-Cx    | 0.57 <sup>c</sup>           | 0.54 <sup>b</sup>           | 0.65 <sup>b</sup>         | 0.73 <sup>b</sup>           | 0.54 <sup>c</sup>         | 0.62 <sup>c</sup>           | 0.56 <sup>b</sup>           | 0.70 <sup>b</sup>           |
|     | MSA-P-IPS | 0.78 <sup>b</sup> (0.029)   | 0.86 <sup>b,d</sup> (0.005) | 0.67 <sup>b</sup>         | 0.75 <sup>b</sup>           | 0.76 <sup>b</sup> (0.041) | 0.58 <sup>l</sup>           | 0.88 <sup>b,d</sup> (0.003) | 0.71 <sup>b</sup>           |
|     | PSP-IPS   | 0.64 <sup>b</sup>           | 0.66 <sup>b</sup>           | 0.80 <sup>b</sup> (0.025) | 0.82 <sup>b</sup> (0.017)   | 0.81 <sup>b</sup> (0.020) | 0.61 <sup>b</sup>           | 0.69 <sup>b</sup>           | 0.71 <sup>b</sup>           |
|     | PSP-MSA-P | 0.70 <sup>c</sup>           | 0.78 <sup>c</sup> (0.041)   | 0.62 <sup>b</sup>         | 0.61 <sup>b</sup>           | 0.58 <sup>b</sup>         | 0.53 <sup>b</sup>           | 0.76 <sup>c</sup>           | 0.54 <sup>b</sup>           |
|     | IPS-Cx    | 0.52 <sup>b</sup>           | 0.57 <sup>c</sup>           | 0.50 <sup>b</sup>         | 0.51 <sup>c</sup>           | 0.73 <sup>c</sup>         | 0.71 <sup>c</sup>           | 0.51 <sup>c</sup>           | 0.52 <sup>c</sup>           |
| FA  | MSA-P-Cx  | 0.66 <sup>c</sup>           | 0.62 <sup>c</sup>           | 0.54 <sup>c</sup>         | 0.67 <sup>c</sup>           | 0.73 <sup>c</sup>         | 0.76 <sup>c</sup>           | 0.74 <sup>c</sup>           | 0.84 <sup>c,d</sup> (0.006) |
|     | PSP-Cx    | 0.50 <sup>c</sup>           | 0.64 <sup>c</sup>           | 0.58 <sup>b</sup>         | 0.54 <sup>b</sup>           | 0.77 <sup>c</sup> (0.035) | 0.80 <sup>c</sup> (0.018)   | 0.58 <sup>b</sup>           | 0.59 <sup>b</sup>           |
|     | MSA-P-IPS | 0.70 <sup>c</sup>           | 0.55 <sup>c</sup>           | 0.63 <sup>c</sup>         | 0.72 <sup>c</sup>           | 0.53 <sup>b</sup>         | 0.57 <sup>c</sup>           | 0.64 <sup>c</sup>           | 0.66 <sup>c</sup>           |
|     | PSP-IPS   | 0.62 <sup>c</sup>           | 0.62 <sup>c</sup>           | 0.56 <sup>b</sup>         | 0.52 <sup>b</sup>           | 0.68 <sup>c</sup>         | 0.70 <sup>c</sup>           | 0.53 <sup>c</sup>           | 0.54 <sup>b</sup>           |
|     | PSP-MSA-P | 0.63 <sup>b</sup>           | 0.56 <sup>c</sup>           | 0.70 <sup>b</sup>         | 0.74 <sup>b</sup>           | 0.63 <sup>c</sup>         | 0.56 <sup>c</sup>           | 0.83 <sup>b</sup> (0.014)   | 0.80 <sup>b</sup> (0.027)   |
| MD  | IPS-Cx    | 0.52 <sup>b</sup>           | 0.56 <sup>c</sup>           | 0.51 <sup>b</sup>         | 0.57 <sup>c</sup>           | 0.59 <sup>c</sup>         | 0.75 <sup>c</sup> (0.040)   | 0.55 <sup>c</sup>           | 0.55 <sup>c</sup>           |
|     | MSA-P-Cx  | 0.62 <sup>c</sup>           | 0.66 <sup>c</sup>           | 0.54 <sup>c</sup>         | 0.63 <sup>c</sup>           | 0.69 <sup>c</sup>         | 0.74 <sup>c</sup>           | 0.61 <sup>c</sup>           | 0.52 <sup>b</sup>           |
|     | PSP-Cx    | 0.65 <sup>c</sup>           | 0.61 <sup>c</sup>           | 0.52 <sup>b</sup>         | 0.71 <sup>b</sup>           | 0.64 <sup>c</sup>         | 0.90 <sup>c,d</sup> (0.002) | 0.51 <sup>b</sup>           | 0.68 <sup>c</sup>           |
|     | MSA-P-IPS | 0.62 <sup>c</sup>           | 0.62 <sup>c</sup>           | 0.54 <sup>b</sup>         | 0.57 <sup>c</sup>           | 0.60 <sup>c</sup>         | 0.51 <sup>c</sup>           | 0.62 <sup>c</sup>           | 0.62 <sup>b</sup>           |
|     | PSP-IPS   | 0.66 <sup>b</sup>           | 0.58 <sup>c</sup>           | 0.56 <sup>b</sup>         | 0.80 <sup>b</sup> (0.032)   | 0.54 <sup>c</sup>         | 0.67 <sup>c</sup>           | 0.53 <sup>b</sup>           | 0.65 <sup>c</sup>           |
| MD  | PSP-MSA-P | 0.51 <sup>c</sup>           | 0.51 <sup>b</sup>           | 0.61 <sup>b</sup>         | 0.84 <sup>b</sup> (0.016)   | 0.56 <sup>b</sup>         | 0.74 <sup>c</sup>           | 0.56 <sup>b</sup>           | 0.68 <sup>c</sup>           |
|     | IPS-Cx    | 0.57 <sup>c</sup>           | 0.52 <sup>c</sup>           | 0.61 <sup>c</sup>         | 0.56 <sup>c</sup>           | 0.65 <sup>c</sup>         | 0.55 <sup>b</sup>           | 0.81 <sup>c</sup> (0.010)   | 0.67 <sup>c</sup>           |
|     | MSA-P-Cx  | 0.67 <sup>c</sup>           | 0.68 <sup>c</sup>           | 0.69 <sup>c</sup>         | 0.67 <sup>c</sup>           | 0.61 <sup>b</sup>         | 0.52 <sup>b</sup>           | 0.61 <sup>c</sup>           | 0.76 <sup>c</sup> (0.035)   |
|     | PSP-Cx    | 0.74 <sup>c</sup>           | 0.71 <sup>c</sup>           | 0.84 <sup>c</sup> (0.016) | 0.88 <sup>c,d</sup> (0.004) | 0.68 <sup>c</sup>         | 0.58 <sup>b</sup>           | 0.94 <sup>c,d</sup> (0.001) | 0.87 <sup>c,d</sup> (0.006) |
|     | MSA-P-IPS | 0.70 <sup>c</sup>           | 0.72 <sup>c</sup>           | 0.51 <sup>b</sup>         | 0.63 <sup>c</sup>           | 0.66 <sup>b</sup>         | 0.56 <sup>b</sup>           | 0.71 <sup>b</sup>           | 0.56 <sup>c</sup>           |
| MD  | PSP-IPS   | 0.67 <sup>c</sup>           | 0.71 <sup>c</sup>           | 0.76 <sup>c</sup> (0.058) | 0.88 <sup>c</sup> (0.006)   | 0.58 <sup>c</sup>         | 0.54 <sup>b</sup>           | 0.73 <sup>c</sup> (0.099)   | 0.82 <sup>c</sup> (0.021)   |
|     | PSP-MSA-P | 0.54 <sup>c</sup>           | 0.55 <sup>l</sup>           | 0.83 <sup>c</sup> (0.021) | 0.81 <sup>c</sup> (0.026)   | 0.71 <sup>c</sup>         | 0.50 <sup>c</sup>           | 0.83 <sup>c</sup> (0.021)   | 0.83 <sup>c</sup> (0.021)   |

**Note:**—Cx indicates controls; MT, magnetization transfer; MSA-P, multiple systems atrophy-type Parkinson.

<sup>a</sup>The results of the ROC analysis for each quantitative map and region of interest are shown. An AUC of 1 signifies a perfect separation between the respective groups by the explored measure/region. An AUC of 0.5 is the minimum value equal to a group separation possible by chance. Values in parentheses are asymptotic *P* values (null hypothesis AUC = 0.5) and are shown when *P* is <.05.

<sup>b</sup>Lower values as a positive indicator.

<sup>c</sup>Higher values as a positive indicator.

<sup>d</sup>Surviving *P* < .0083.
